# Supplementary material for: Effects of Short-Term Plyometric Training on Agility, Jump and Repeated Sprint Performance in Female Soccer Players
Source: Int J Environ Res Public Health. 2021 Feb 25;18(5):2274. doi: 10.3390/ijerph18052274 (PMC7956435; doi:10.3390/ijerph18052274)
Supplement: Supplementary file 1 [file ijerph-18-02274-s001.pdf]

Figure S1. Graphic scheme of exercises applied in the plyometric training of female soccer players

1.

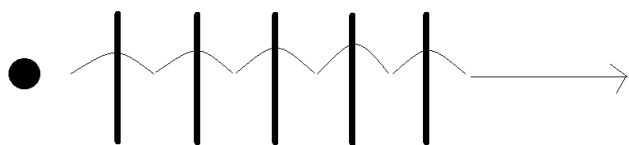

2.

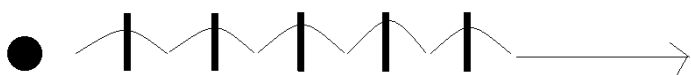

3.

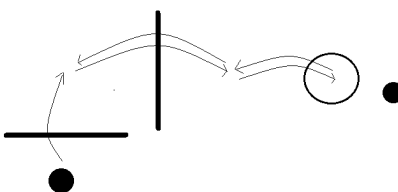

4.

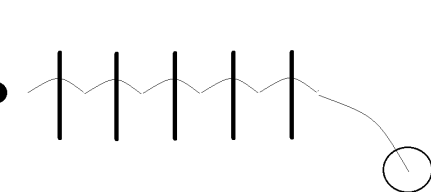

5.

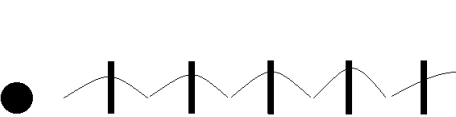

6.

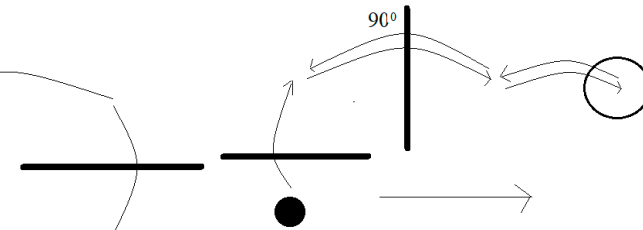

7.

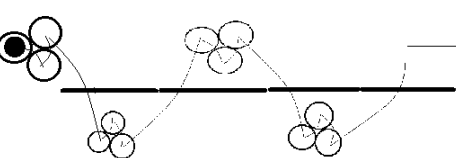

8.

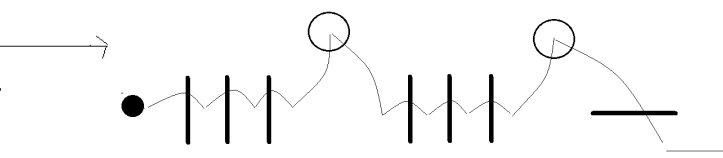

9.

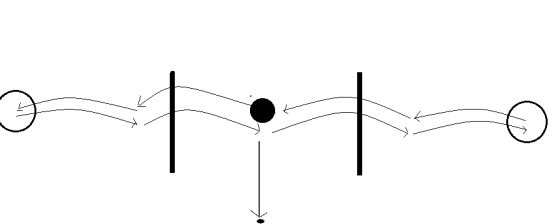

10.

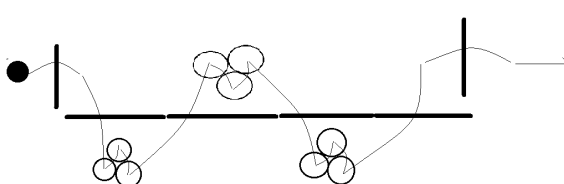

11.

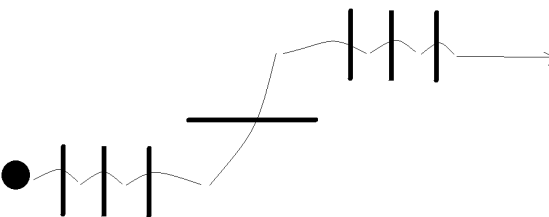

12.

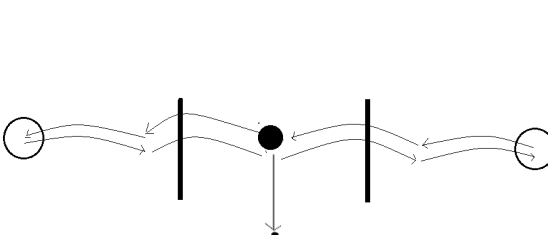

13.

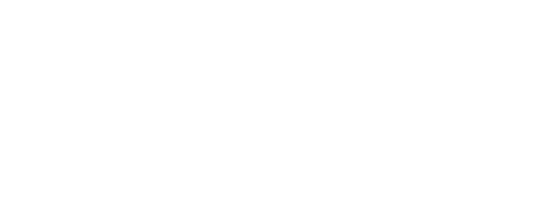

14.

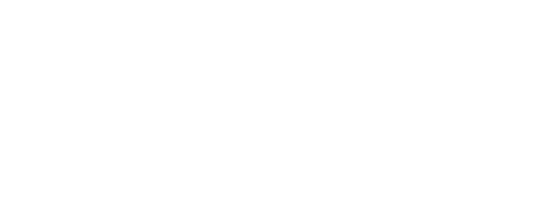

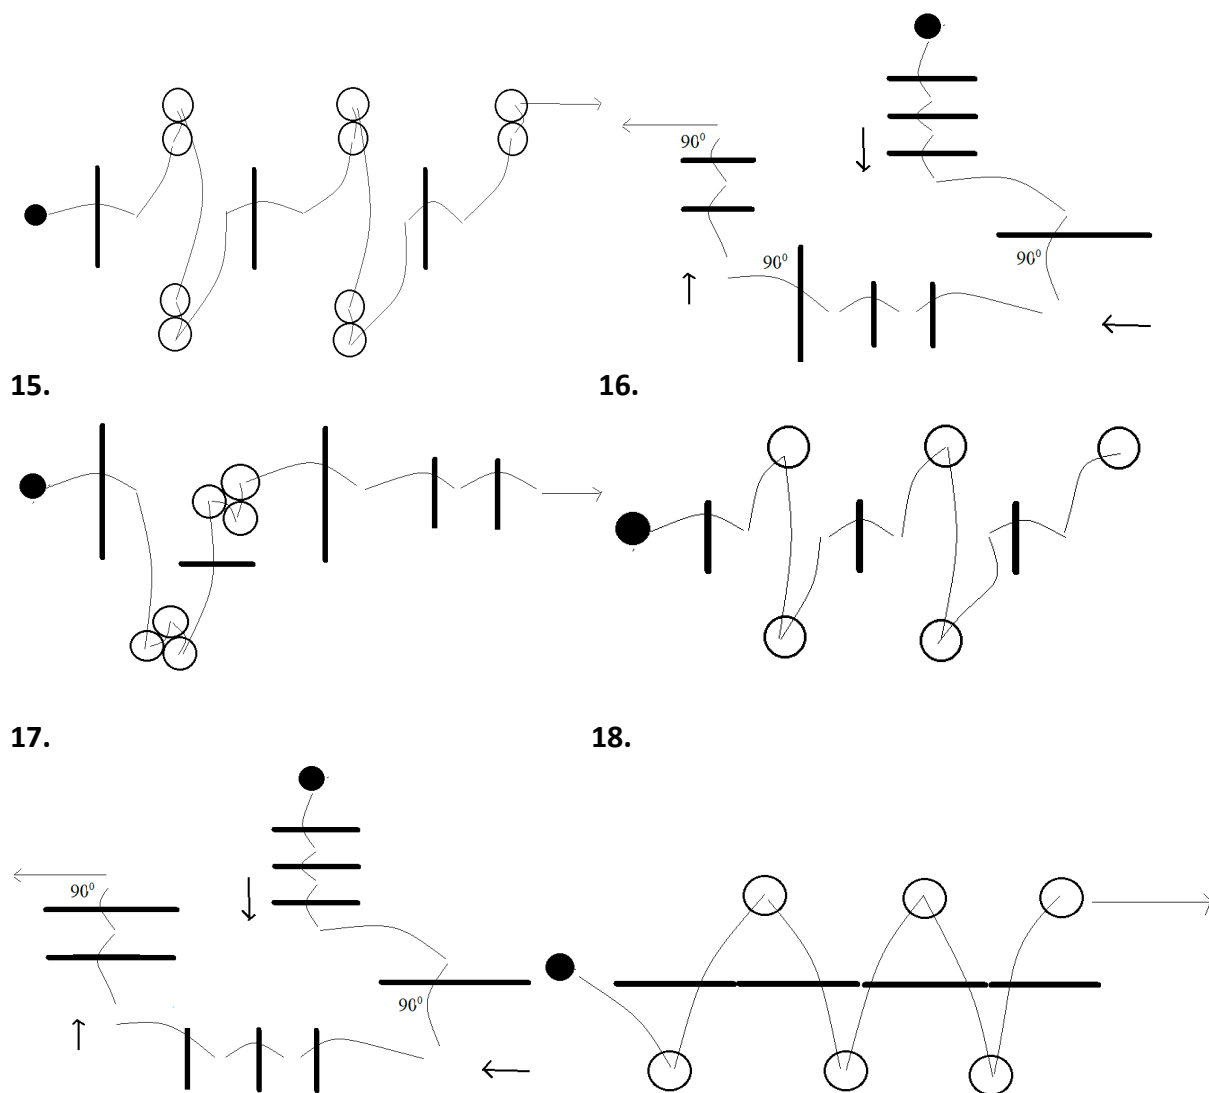

### Legend

- - person performing exercise
- - direction
- - gymnastics ring
- 1. — - hurdle (45 cm)
- 2. † - hurdle (10 cm)
- 3. / 4. / 5. / 6. — † - hurdle (45 cm)  
† - hurdle (10 cm)
- 7. / 8. † - hurdle (10 cm)
- 9. — - hurdle (45 cm)
- 10. † - hurdle (10 cm)
- 11. † - hurdle (10 cm)

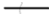 - hurdle (45 cm)

12.

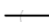 - hurdle (45 cm)

13.

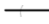 - hurdle (45 cm)

14.

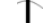 - hurdle (10 cm)

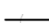 - hurdle (45 cm)

15.

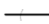 - hurdle (45 cm)

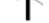 - hurdle (10 cm)

16.

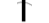 - hurdle (10 cm)

17.

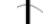 - hurdle (10 cm)

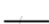 - hurdle (68 cm)

18.

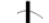 - hurdle (10 cm)
